# Supplementary material for: miR-374 family is a key regulator of chronic primary pain onset
Source: PubMed Central journal article supplement — Pain Rep. 2024 Oct 16;9(6):e1199. doi: 10.1097/PR9.0000000000001199 (PMC11487220; doi:10.1097/pr9.0000000000001199), 2024-10-16
Supplement: painreports-9-e1199-s001.pdf [file painreports-9-e1199-s001.pdf]

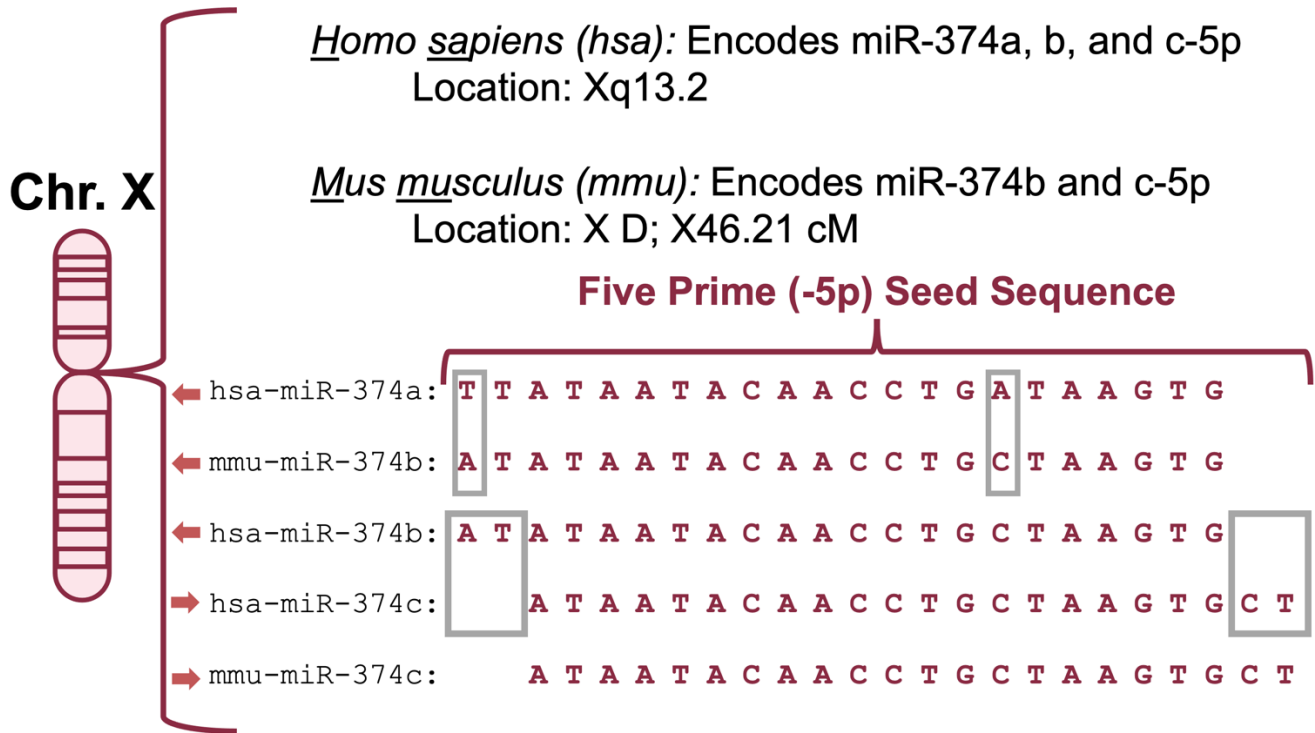

**Supplementary Figure 1. Map of miR-374 family.** Adapted from Bian et al. (*J Cell Mol Med*, 2019), the miR-374 family is located within and cleaved from the long noncoding RNA Five prime to X-inactive specific transcript (*FTX*), which is situated in the X-chromosome in both humans and mice. Arrows indicate direction of transcription. Across species and within subtype, miR-374 members are 100% homologous in the 22 base pair sequence. Across subtypes, miR-374 members are 91% homologous with 20/22 identical base pairs. In fact, miR-374b-5p and miR-374c-5p are isomiRs of each other since they are derived from the same precursor miRNA.

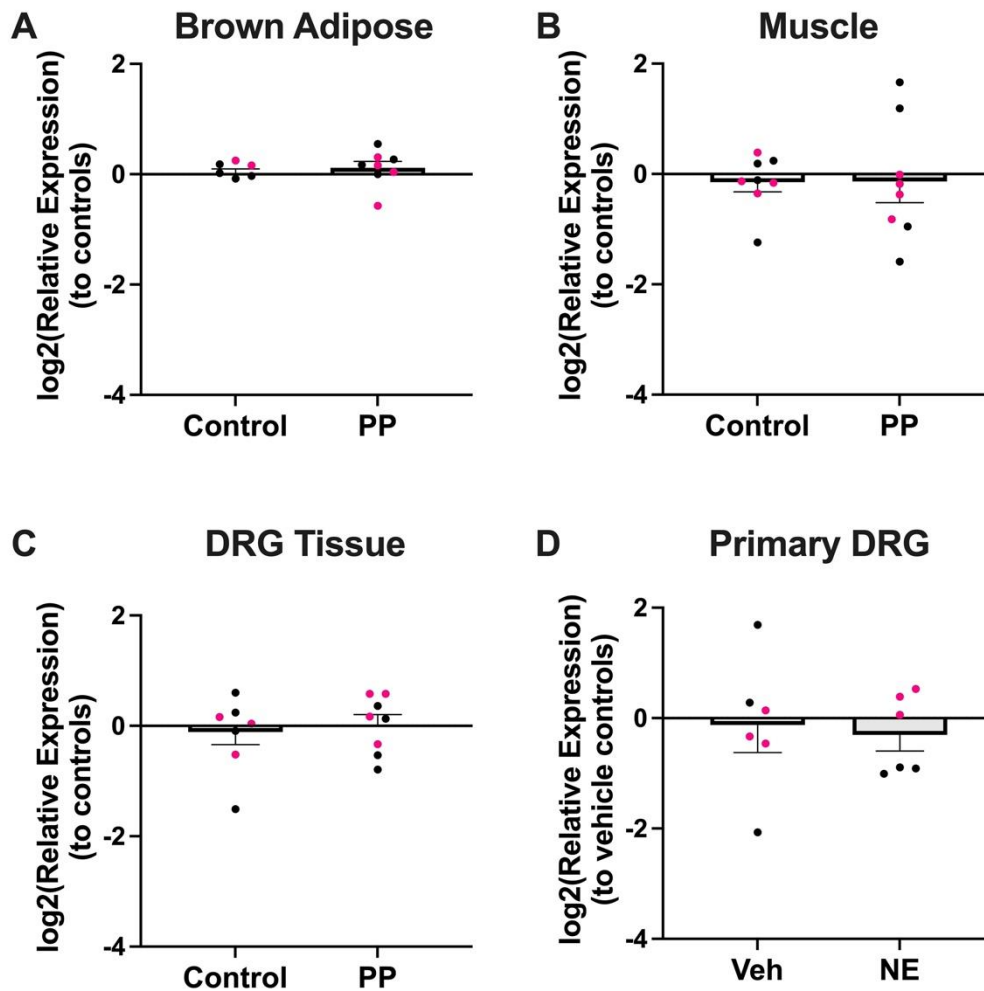

**Supplementary Figure 2. miR-374 is not globally downregulated.** While differential expression of miR-374 was observed in other tissues during PP onset, no differential expression of this miRNA was observed in either brown adipose (**A**), muscle (**B**), or dorsal root ganglion (DRG) tissue (**C**), suggesting tissue-specific regulation of miR-374. miR-374 expression is not significantly changed by stimulating primary DRG cultures from either male or female mice with the pan-adrenergic endogenous agonist norepinephrine ("NE") (**D**). Data from females and their derived cultures are shown in **pink**, while males are shown in **black**. Data are mean + SEM.

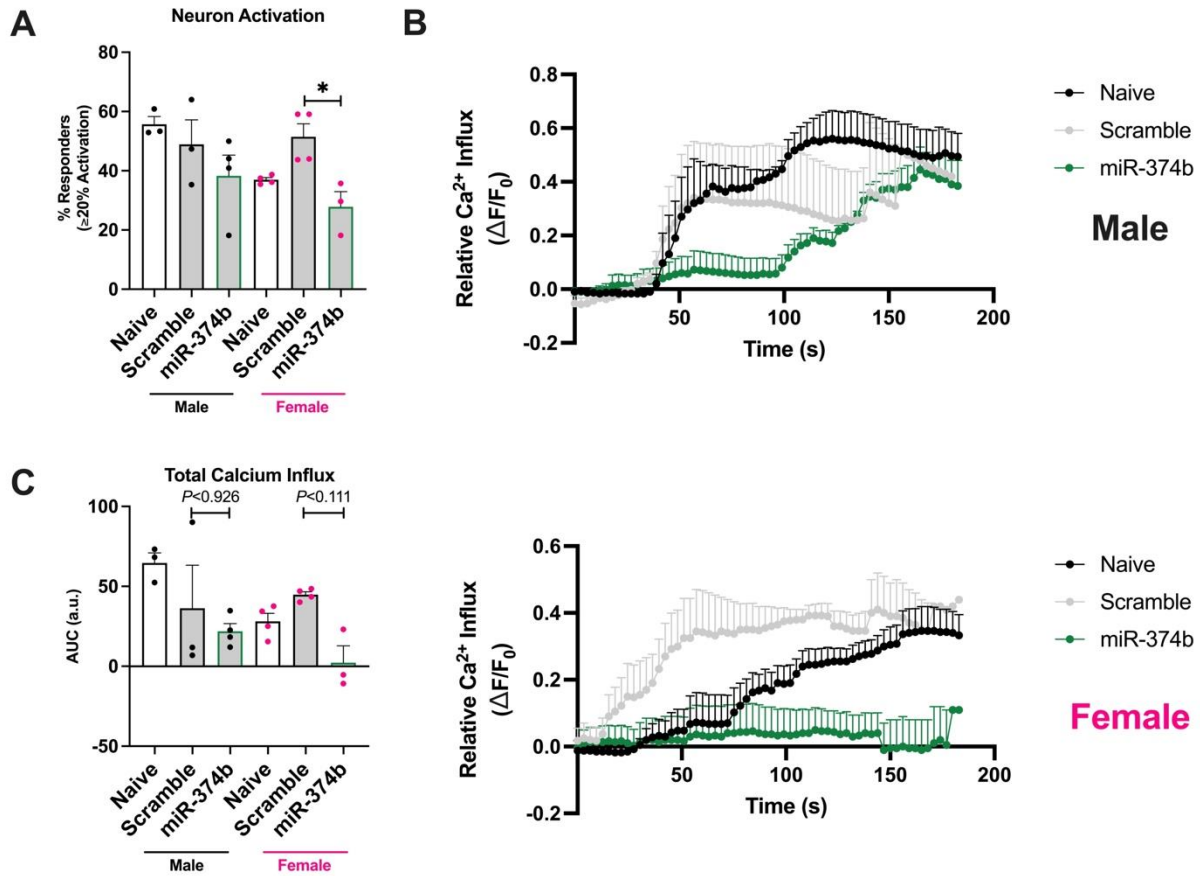

**Supplementary Figure 3. Emerging sex differences in miR-374b-5p's role in neuron activation.** Although no measurement of calcium influx showed a significant group\*sex interaction, percent responders and total calcium influx (area under the curve, AUC) did feature a main effect of sex ( $P<0.05$ ). For measures of percent responders (**A**), relative calcium influx (**B**), and total calcium influx (**C**), female-derived neurons showed greater inhibition than male-derived neurons. Data from female-derived cultures are shown in **pink**, while male-derived cultures are shown in **black**. Data are mean + SEM, and asterisk indicates a Tukey's HSD  $P<0.05$ .

**Supplemental Table 1. Demographics for TMD Study Participants**

|                       | <b>Pain-free Controls<br/>N=283</b> | <b>TMD<br/>N=205</b> | <b>P-value</b> |
|-----------------------|-------------------------------------|----------------------|----------------|
| Other CPPCs, N (%)    |                                     |                      | <0.001         |
| No                    | 107 (37.81%)                        | 25 (15.12%)          |                |
| Yes                   | 184 (62.19%)                        | 174 (84.88%)         |                |
| Age, N (%)            |                                     |                      | 0.03*          |
| 18-24                 | 6 (2.12%)                           | 25 (12.20%)          |                |
| 25-34                 | 109 (38.52%)                        | 78 (38.05%)          |                |
| 35-44                 | 84 (29.68%)                         | 51 (24.88%)          |                |
| 45-54                 | 86 (30.39%)                         | 38 (18.54%)          |                |
| 55-64                 | 4 (1.41%)                           | 9 (4.39%)            |                |
| 65-74                 | 4 (1.41%)                           | 2 (0.98%)            |                |
| Mean (SD)             | 38.6 (9.2)                          | 36.5 (11.34)         |                |
| Gender, N (%)         |                                     |                      | <0.001*        |
| Women                 | 189 (66.78%)                        | 153 (74.63)          |                |
| Men                   | 94 (33.22%)                         | 52 (25.37%)          |                |
| Race/Ethnicity, N (%) |                                     |                      | <0.001         |
| White                 | 192 (67.84%)                        | 144 (70.24%)         |                |
| African American      | 79 (27.92%)                         | 30 (14.63%)          |                |
| Asian                 | 6 (2.12%)                           | 8 (3.90%)            |                |
| Native American       | 0 (0.00%)                           | 0 (0.00%)            |                |
| Multiple              | 1 (0.35%)                           | 8 (3.90%)            |                |
| Unknown               | 3 (1.06%)                           | 2 (0.98%)            |                |
| Hispanic/Latino       | 11 (3.89%)                          | 14 (6.83%)           |                |

**Supplemental Table 2. miRNA Sequence and Chromosome Location**

| <b>mb22_NAME</b> | <b>mb22_ID</b> | <b>hg38_LOCUS</b>      | <b>Sequence</b>             |
|------------------|----------------|------------------------|-----------------------------|
| hsa-miR-197-3p   | MIMAT0000227   | 1:109598940-109598961  | UUCACCACCUUCUCCACCCAGC      |
| hsa-miR-6734-5p  | MIMAT0027369   | 1:43364688-43364710    | UUGAGGGGAGAAUGAGGUGGAGA     |
| hsa-miR-1248     | MIMAT0005900   | 3:186786675-186786701  | ACCUUCUUGUAUAAGCACUGUGCUAAA |
| hsa-miR-1226-3p  | MIMAT0005577   | 3:47849608-47849629    | UCACCAGCCCUGUGUUCUUAG       |
| hsa-miR-1229-3p  | MIMAT0005584   | 5:179798278-179798300  | CUCUCACCACUGCCCUCACAG       |
| hsa-miR-4646-5p  | MIMAT0019707   | 6:31701070-31701091    | ACUGGGAAGAGGAGCUGAGGGA      |
| hsa-miR-3609     | MIMAT0017986   | 7:98881700-98881723    | CAAAGUGAUGAGUAAUACUGGCUG    |
| hsa-miR-671-5p   | MIMAT0003880   | 7:151238449-151238471  | AGGAAGCCUGGAGGGCUGGAG       |
| hsa-miR-146b-3p  | MIMAT0004766   | 10:102436557-102436578 | GCCUGUGGACUCAGUUCUGGU       |
| hsa-miR-6743-3p  | MIMAT0027388   | 11:209383-209405       | AGCCGCUCUUCUCCUGCCCACA      |
| hsa-miR-127-3p   | MIMAT0000446   | 14:100883035-100883056 | CUGAAGCUCAGAGGGCUCUGAU      |
| hsa-miR-433-3p   | MIMAT0001627   | 14:100881949-100881970 | AUCAUGAUGGGCUCUCGGUGU       |
| hsa-miR-485-3p   | MIMAT0002176   | 14:101055464-101055485 | GUCAUACACGGCUCUCCUCUCU      |
| hsa-miR-1249-3p  | MIMAT0005901   | 22:45200958-45200979   | ACGCCCUUCCCCCUUCUUCA        |
| hsa-miR-374a-5p  | MIMAT0000727   | X:74287325-74287346    | UUUAUAACAACCUGAUAAGUG       |
| hsa-miR-766-3p   | MIMAT0003888   | X:119646763-119646784  | AGGAGGAAUUGGUGCUGGUCUU      |

**Supplemental Table 3. Demographics for FMS Study Participants**

|                       | <b>Pain-free Controls<br/>N=24</b> | <b>FMS<br/>N=24</b> | <b>P-value</b> |
|-----------------------|------------------------------------|---------------------|----------------|
| Age, N (%)            |                                    |                     | 0.06           |
| 40-50                 | 8 (33.33%)                         | 5 (20.83%)          |                |
| 51-60                 | 8 (33.33%)                         | 16 (66.67%)         |                |
| 61-74                 | 8 (33.33%)                         | 3 (12.50%)          |                |
| Mean (SD)             | 56.00 (8.15)                       | 54.00 (7.36)        |                |
| Gender, N (%)         |                                    |                     | 0.70           |
| Women                 | 19 (79.17%)                        | 23 (87.50%)         |                |
| Men                   | 5 (20.83%)                         | 1 (4.17%)           |                |
| Race/Ethnicity, N (%) |                                    |                     | 0.16           |
| White                 | 17 (70.83%)                        | 21 (70.90%)         |                |
| Black                 | 0 (0.00%)                          | 0 (0.00%)           |                |
| Arab                  | 0 (0.00%)                          | 0 (0.00%)           |                |
| Latino/Hispanic       | 1 (4.17%)                          | 2 (8.33%)           |                |
| Filipino              | 0 (0.00%)                          | 0 (0.00%)           |                |
| South Asian           | 0 (0.00%)                          | 0 (0.00%)           |                |
| West Asian            | 2 (8.33%)                          | 0 (0.00%)           |                |
| East Asian            | 0 (0.00%)                          | 0 (0.00%)           |                |
| Southeast Asian       | 1 (4.17%)                          | 0 (0.00%)           |                |
| Jewish                | 1 (4.17%)                          | 0 (0.00%)           |                |
| Aboriginal            | 0 (0.00%)                          | 1 (4.17%)           |                |
| Other                 | 1 (4.17%)                          | 0 (0.00%)           |                |
| Prefer Not to Answer  | 0 (0.00%)                          | 0 (0.00%)           |                |
| I Don't Know          | 1 (4.17%)                          | 0 (0.00%)           |                |
| BMI, Mean (SD)        | 28.80 (5.30)                       | 31.50 (8.25)        | 0.20           |
| FMS Score, Mean (SD)  | 5 (5.00)                           | 22 (6.00)           | <0.001*        |

**Supplemental Table 4. Demographics for the MVC Study Participants**

|                                        | <b>Low Pain<br/>N=81</b> | <b>High Pain<br/>N=86</b> | <b>P-value</b> |
|----------------------------------------|--------------------------|---------------------------|----------------|
| Age, Mean (SD)                         | 34.80 (12.30)            | 34.90 (11.80)             | 0.63           |
| Gender, N (%)                          |                          |                           | 0.89           |
| Women                                  | 51 (63.00%)              | 55 (64.00%)               |                |
| Men                                    | 30 (37.00%)              | 31 (36.00%)               |                |
| BMI, Mean (SD)                         | 28.90 (6.00)             | 29.70 (7.20)              | 0.44           |
| Pain Severity, Mean (SD)               | 5.52 (1.54)              | 8.95 (0.89)               | <0.001*        |
| Stress Level (PDI Score),<br>Mean (SD) | 20.40 (11.10)            | 26.30 (11.40)             | <0.001*        |

**Supplemental Table 5. Mimics, primers and kits used for experiments**

| Item Name                                     | Company      | Cat No. | Assay ID      | Sequence                                                                                            |
|-----------------------------------------------|--------------|---------|---------------|-----------------------------------------------------------------------------------------------------|
| mmu-miR-374b-5p Mimic                         | ThermoFisher | 4464066 | MH11339       | AUAUAAUACAACCUGCUAAGUG                                                                              |
| mirVana™ miRNA Inhibitor, Negative Control #1 | ThermoFisher | 4464076 | N/A           | Proprietary                                                                                         |
| mmu-miR-374b-5p                               | Qiagen       | 339306  | YP00204608    | AUAUAAUACAACCUGCUAAGUG                                                                              |
| cel-miR-39-3p                                 | Qiagen       | 339306  | YP00203952    | UUAUACCGAGAGCCCAGCUGAUU<br>UCGUCUUGGUAUAAGCUCGUC<br>AUUGAGAUUAUCACCGGGUGUA<br>AAUCAGCUUGGCUCUGGUGUC |
| UniSp6                                        | Qiagen       | 339306  | YP00203954    | Proprietary                                                                                         |
| ATXN7                                         | ThermoFisher | 4331182 | Mm01315281_m1 | NM_139227.4                                                                                         |
| CBL                                           | ThermoFisher | 431182  | Mm00483069_m1 | NM_007619.2                                                                                         |
| CRK, Variant II                               | ThermoFisher | 4331182 | Mm00467065_m1 | NM_133656.5                                                                                         |
| CRKL                                          | ThermoFisher | 4331182 | Mm00464462_m1 | NM_007764.5                                                                                         |
| EP300                                         | ThermoFisher | 4331182 | Mm00625535_m1 | NM_177821.6                                                                                         |
| HIF1A                                         | ThermoFisher | 4331182 | Mm00468869_m1 | NM_010431.2                                                                                         |
| KIDINS220                                     | ThermoFisher | 4331182 | Mm01287158_m1 | NM_001081378.1                                                                                      |
| NUMB                                          | ThermoFisher | 4331182 | Mm00477927_m1 | NM_001272056.1                                                                                      |
| PTPN11                                        | ThermoFisher | 4331182 | Mm00448434_m1 | NM_001109992.1                                                                                      |
| TGFBR2                                        | ThermoFisher | 4331182 | Mm00436976_m1 | NM_009371.3                                                                                         |
| ACTB                                          | ThermoFisher | 4331182 | Mm02619580_g1 | GenBank: AK075973.1                                                                                 |
| 18S                                           | ThermoFisher | 4331182 | Mm03928990_g1 | NR_003278.3                                                                                         |
| PAXgene Blood miRNA Kit                       | Qiagen       | 763134  | N/A           | N/A                                                                                                 |
| miRCURY LNA RT                                | Qiagen       | 339340  | N/A           | N/A                                                                                                 |
| miRNA Spike In                                | Qiagen       | 339390  | N/A           | N/A                                                                                                 |
| miRCURY LNA SYBR Green PCR                    | Qiagen       | 339345  | N/A           | N/A                                                                                                 |
| High-capacity cDNA Reverse Transcription Kit  | ThermoFisher | 4368813 | N/A           | N/A                                                                                                 |



|                                    |              |         |     |     |
|------------------------------------|--------------|---------|-----|-----|
| TaqMan Fast<br>Advanced Master Mix | ThermoFisher | 4444557 | N/A | N/A |
|------------------------------------|--------------|---------|-----|-----|

**Supplemental Table 6. Reactome Analysis**

| <b>Rank</b> | <b>Unique Enriched Pathway</b>          | <b>Observed Genes (of 69)</b> | <b>Strength</b> | <b>False Discovery Rate</b> |
|-------------|-----------------------------------------|-------------------------------|-----------------|-----------------------------|
| 1           | Signal Transduction                     | 34                            | 0.58            | 2.60E-10                    |
| 2           | Disease                                 | 26                            | 0.64            | 1.24E-08                    |
| 3           | Membrane Trafficking                    | 21                            | 0.98            | 6.69E-12                    |
| 4           | Protein Metabolism                      | 19                            | 0.45            | 1.10E-03                    |
| 5           | Immune System                           | 19                            | 0.44            | 1.40E-03                    |
| 6           | Post-Translational Protein Modification | 18                            | 0.56            | 9.25E-05                    |
| 7           | Generic Transcription Pathway           | 16                            | 0.58            | 2.60E-04                    |
| 8           | Developmental Biology                   | 14                            | 0.56            | 1.20E-03                    |
| 9           | Chromatin Modifying Enzymes             | 13                            | 1.19            | 1.92E-09                    |
| 10          | Hemostasis                              | 9                             | 0.63            | 5.90E-03                    |

## Supplementary File 1. Additional RNA-seq Methods

**OPPERA:** Blood samples were collected at the time of enrollment in PaxGene tubes and total RNA isolated using Qiacube column-based or Chemagic magnetic bead separation. For small RNA-seq, approximately 75ng total RNA was prepared using the TriLink Cleantag small RNA kit, small RNA-seq libraries were generated and quantified with Qubit reading and Bioanalyzer size checking, and then pooled for cBot amplification and sequencing on the Illumina HiSeq 3000 platform with 50bp single read sequencing. Demultiplexing with Bcl2fastq2 was employed to generate the fastq file for each sample, the 3' adapters were trimmed, and sequencing reads aligned with their reference genome.

For mRNA-seq, approximately 250ng total RNA was prepared using the Illumina TruSeq stranded mRNA kit. The first step in the workflow involves purifying the poly-A containing mRNA molecules using poly-T oligo-attached magnetic beads. Following purification, the mRNA is fragmented into small pieces using divalent cations under elevated temperature. The cleaved RNA fragments are copied into first strand cDNA using reverse transcriptase and random primers. This is followed by second strand cDNA synthesis using DNA Polymerase I and RNase H. In stranded RNA-seq protocol, Strand specificity is achieved by replacing dTTP with dUTP in the Second Strand Marking Mix (SMM). The incorporation of dUTP in second strand synthesis effectively quenches the second strand during amplification since the polymerase used in the assay will not incorporate past this nucleotide. Further specificity is achieved by addition of Actinomycin D to the First Strand Master Mix Act D (FSA). Actinomycin prevents spurious DNA dependent synthesis during first strand synthesis, while allowing RNA dependent synthesis. These cDNA fragments then go through an end repair process, the addition of a single 'A' base, and then ligation of the adapters. The products are then purified and enriched with PCR to create the final RNA-seq library. After RNA-seq libraries were subjected to quantification process, pooled for cBot amplification and subsequent sequencing run with Illumina HiSeq 3000 platform with 50bp single read sequencing. After the sequencing run, demultiplexing with Bcl2fastq2 was employed to generate the fastq file for each sample.

For both miRNA- and mRNA-seq, Deep-sequencing reads were aligned on the human genome version hg38/GRCh38 using Bowtie2 v2.3.4 with very sensitive local alignment preset parameters, after trimming adaptor sequences with cutadapt v1.15. Quantification of miRNAs were obtained using ShortStack v3.8.5 against miRbase release 22 annotation with hg38 reference genome, and output as count matrix.

**AA CRASH:** Blood samples were collected in the ED at the time of enrollment using PAXgene RNA tubes and total RNA isolated using the PAXgene blood miRNA kit. Template libraries for small RNA sequencing were produced from 1.0 µg total RNA. Using an in-house adaptation of published protocols (TruSeq Small RNA library prep kits according to Illumina's manufacturer specifications), 12 barcoded libraries were combined per lane and sequenced on a HiSeq 2000 at the University of North Carolina at Chapel Hill High Throughput Sequencing Facility. Reads were demultiplexed (bcl2fastq), had barcode and adapter sequences removed, and then fastq files were generated. Mature miRNA sequences were obtained from miRbase v22.1 and genomic extensions were added before aligning with sequencing reads. Reads were aligned on human genome version hg19, and quantification of miRNAs were obtained using RSEM. Total read counts were generated including isomir and non-templated nucleotide addition.
